# Supplementary material for: A Longitudinal Low DoseμCT Analysis of Bone Healing in Mice: A Pilot Study
Source: Hindawi journal article supplement (doi:10.1155/2014/791539), 2014-01-01
Supplement: f1 [file 791539.f1.pdf]

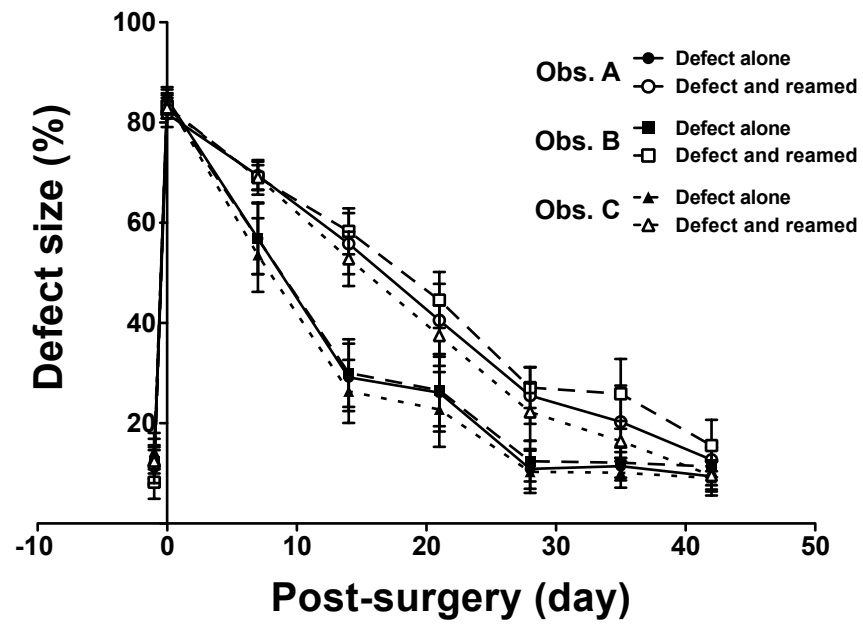

**Figure S1**

**Figure S1. Bone healing kinetics assessment by three different observers**

Healing kinetics were plotted based on the 3D ROI determinations of three observers. The y-axis is the percentage of cortical defect volume compared to day 0, and the x-axis is time in post-operative days. The solid, dashed, and dotted lines represent the bone healing kinetics based on the 3D ROI determinations of three observers (A, B, and C). Filled and empty symbols represent the defect without reaming and the defect with reaming, respectively (n=9). Since the resulting graphs were almost identical, we concluded that there was no significant inter-observer bias.
